# Supplementary material
Source: publisher figshare collection journal article supplement (https://sage.figshare.com/ndownloader/files/22862549)
Supplement: Supplementary file [file 22862549]

## Supplementary material

**Table S1.** Overview of outcome measures used in the included studies

| Domain          | Measure                                                              | Studies                                                                  | Total |
|-----------------|----------------------------------------------------------------------|--------------------------------------------------------------------------|-------|
| BPSD            | Geriatric Depression Scale (GDS)                                     | Massimi et al. (2008); Silva et al. (2017); Subramaniam and Woods (2016) | 3     |
|                 | Apathy Evaluation Scale (AES)                                        | Massimi et al. (2008); Navarro et al. (2015; 2016)                       | 3     |
|                 | Neuropsychiatric Inventory (NPI)                                     | Navarro et al. (2015; 2016)                                              | 2     |
|                 | Cohen-Mansfield Agitation Inventory (CMAI)                           | Davison et al. (2016)                                                    | 1     |
|                 | Cornell Scale for Depression in Dementia (CSDD)                      | Davison et al. (2016)                                                    | 1     |
|                 | Rating Anxiety in Dementia (RAID)                                    | Davison et al. (2016)                                                    | 1     |
|                 | Observational Measurement of Engagement                              | Davis and Shenk (2015)                                                   | 1     |
|                 | Positive response schedule                                           | O'Connor et al. (2011)                                                   | 1     |
| Memory          | Autobiographical Memory Interview (AMI)                              | Massimi et al. (2008); Subramaniam and Woods (2016)                      | 2     |
|                 | Free recall memory index                                             | Karlsson et al. (2014)                                                   | 1     |
|                 | Recognition memory index                                             | Karlsson et al. (2014)                                                   | 1     |
| Cognition       | Mini-mental state examination (MMSE)                                 | Karlsson et al. (2014); Massimi et al. (2008)                            | 2     |
|                 | Informant Questionnaire of Cognitive Decline in the Elderly (IQCODE) | Massimi et al. (2008)                                                    | 1     |
| Well-being      | Philadelphia Geriatric Centre Morale Scale (PGCMS)                   | Karlsson et al. (2014)                                                   | 1     |
|                 | WHO-5 Well-being Index                                               | Laird et al. (2018)                                                      | 1     |
| Relationships   | Mutuality Scale                                                      | Laird et al. (2018)                                                      | 1     |
|                 | Quality of the Carer Patient Relationship (QCPR)                     | Laird et al. (2018)                                                      | 1     |
| Quality of Life | WHO Quality of Life- Old (WHOQOL-OLD)                                | Silva et al. (2017)                                                      | 1     |
|                 | Quality of Life in Alzheimer's Disease (QOL-AD)                      | Subramaniam and Woods (2016)                                             | 1     |
| Identity        | Self-image Profile Adult (SIP-AD)                                    | Massimi et al. (2008)                                                    | 1     |
|                 | Twenty Statements Test (TST)                                         | Massimi et al. (2008)                                                    | 1     |
| Goal setting    | Goal Attainment Scale (GAS)                                          | Massimi et al. (2008)                                                    | 1     |
| Functioning     | Adults and Older Adults Functional Assessment Inventory (IAFAI)      | Silva et al. (2017)                                                      | 1     |
